# Supplementary material
Source: HighWire-hosted journal article supplement (http://www.annfammed.org/highwire/filestream/8858/field_highwire_adjunct_files/0/Fedewa_Supp_Apps.pdf)

Supplemental materials for:

Fedewa S, Gansler T, Smith R, et al. recent patterns in shared decision making for prostate-specific antigen testing in the United States. *Ann Fam Med*. 2018;16(2):139-144.

Supplemental Table 1. Shared Decision Making Questions in the National Health Interview Survey and Categorization, 2010 and 2013

| <b>NHIS Questions and Responses</b>                                                                                                                                                                   |                                                                                                                                                                                               |
|-------------------------------------------------------------------------------------------------------------------------------------------------------------------------------------------------------|-----------------------------------------------------------------------------------------------------------------------------------------------------------------------------------------------|
| <i>Questions</i>                                                                                                                                                                                      | <i>Response Options</i>                                                                                                                                                                       |
| Among men reporting previous PSA testing, questions were initiated with “Before you had the PSA test did...”<br>Among men reporting no previous PSA testing, the following questions began with “Did” |                                                                                                                                                                                               |
| 1. A doctor EVER talk with you about the advantages of the PSA test?                                                                                                                                  | Yes, No, Refused, don’t know                                                                                                                                                                  |
| 2. A doctor EVER talk with you about the disadvantages of the PSA test?                                                                                                                               | Yes, No, Refused, don’t know                                                                                                                                                                  |
| 3. A doctor EVER tell you that some experts disagree about whether men should have PSA tests?                                                                                                         | Yes, No, Refused, don’t know                                                                                                                                                                  |
|                                                                                                                                                                                                       |                                                                                                                                                                                               |
| <b>Mutually Exclusive Shared Decision Making Categories<sup>a</sup></b>                                                                                                                               |                                                                                                                                                                                               |
| <i>Categories</i>                                                                                                                                                                                     | <i>Coding</i>                                                                                                                                                                                 |
| None                                                                                                                                                                                                  | Answered No to Questions 1, 2 and 3                                                                                                                                                           |
| Full                                                                                                                                                                                                  | Answered Yes to Questions 1, 2, and 3                                                                                                                                                         |
| Advantages Only                                                                                                                                                                                       | Answered Yes to Questions 1 and no to Questions 2 and 3                                                                                                                                       |
| Advantages and Disadvantages                                                                                                                                                                          | Answered Yes to Questions 1 and 2, but no to Question 3.                                                                                                                                      |
| Other                                                                                                                                                                                                 | Answered Yes to Questions 1 and 3, but no to Question 2<br>or<br>Answered Yes to Question 2 and 3, but no to Question 1<br>or<br>Answered Yes to Question 2 but no to Questions 1 and 3<br>or |

a. Participants who refused or answered “don’t know” on any of the three questions were excluded from the analysis as outlined in Supplemental Figure 1.

Supplemental Table 2. Respondent Characteristics by Survey Year among Men  $\geq 50$  years, NHIS 2010 and 2015 (n=9,598)<sup>a</sup>

|                                                 | 2010 |      | 2015 |      | P-value |
|-------------------------------------------------|------|------|------|------|---------|
|                                                 | N    | %    | N    | %    |         |
| <b>Age Category</b>                             |      |      |      |      | 0.041   |
| 50-64 y                                         | 2423 | 66.3 | 3243 | 63.1 |         |
| 65-74 y                                         | 914  | 21.5 | 1559 | 23.8 |         |
| 75+ y                                           | 557  | 12.2 | 902  | 13.1 |         |
| <b>Race/Ethnicity</b>                           |      |      |      |      | 0.020   |
| Hispanic                                        | 498  | 9.4  | 623  | 10.3 |         |
| NH White                                        | 2559 | 77.2 | 4057 | 74.3 |         |
| NH Black                                        | 601  | 9.2  | 700  | 9.7  |         |
| Other                                           | 236  | 4.3  | 324  | 5.7  |         |
| <b>Educational Attainment</b>                   |      |      |      |      | 0.002   |
| <HS                                             | 745  | 15.9 | 854  | 13.1 |         |
| HS or GED                                       | 1063 | 26.9 | 1542 | 26.0 |         |
| Some College                                    | 965  | 24.9 | 1582 | 27.8 |         |
| College Graduate                                | 1106 | 32.3 | 1701 | 33.1 |         |
| <b>Insurance Category</b>                       |      |      |      |      | <0.001  |
| Private                                         | 1554 | 45.8 | 2170 | 45.5 |         |
| Medicaid/State Plan                             | 139  | 2.7  | 300  | 4.3  |         |
| Medicare                                        | 1358 | 31.8 | 2206 | 34.5 |         |
| Military                                        | 178  | 4.5  | 205  | 3.5  |         |
| Uninsured                                       | 448  | 10.2 | 387  | 6.4  |         |
| Other                                           | 217  | 4.9  | 436  | 5.8  |         |
| <b>PCP or Specialist Visit in the Past Year</b> | 2926 | 77.0 | 4322 | 77.0 | 1.000   |
| <b>Family History of PC<sup>a</sup></b>         | 271  | 7.5  | 401  | 7.6  | 0.868   |
| <b>PSA Testing History</b>                      |      |      |      |      | <0.001  |
| Never                                           | 1758 | 42.7 | 2657 | 44.7 |         |
| A year or less                                  | 1378 | 38.1 | 1701 | 32.1 |         |
| >1 and $\leq 2$ y                               | 342  | 8.7  | 507  | 8.9  |         |
| >2 and $\leq 3$ y                               | 157  | 3.8  | 272  | 5.3  |         |
| >3 and $\leq 5$ y                               | 121  | 3.1  | 264  | 4.3  |         |
| >5 y                                            | 138  | 3.5  | 303  | 4.7  |         |

Abbreviations: National Health Interview Survey (NHIS), Non-Hispanic (NH) High School (HS), Graduate Equivalent Degree (GED), Primary Care Physician (PCP), Years (Y), PCa (Prostate Cancer)

a. Number of men missing data on the following items are shown in parenthesis: Educational Attainment (40), visiting a primary care physician (3), Place of Birth (2), Family History of PC (315)

b. Brother, son or father diagnosed with prostate cancer.

Supplemental Table 3. Adjusted Prevalence Ratios and 95% CI Predicting Shared Decision Making, NHIS 2010 and 2015

|                                                                                                                         | Any vs none |      |       | Advantages vs none |             |             | Advantages+<br>Disadvantages vs none |      |       | Full vs none |             |             |
|-------------------------------------------------------------------------------------------------------------------------|-------------|------|-------|--------------------|-------------|-------------|--------------------------------------|------|-------|--------------|-------------|-------------|
| <i>Model 1: Among men 50+ who Received PSA Testing in the Past 2 Years for Routine Reasons<sup>a</sup></i>              |             |      |       |                    |             |             |                                      |      |       |              |             |             |
| Year                                                                                                                    | aPR         |      | 95%CI | aPR                |             | 95%CI       | aPR                                  |      | 95%CI | aPR          |             | 95%CI       |
| 2010                                                                                                                    | 1.00        |      |       | 1.00               |             |             | 1.00                                 |      |       | 1.00         |             |             |
| 2015                                                                                                                    | 1.03        | 0.96 | 1.10  | <b>0.81</b>        | <b>0.69</b> | <b>0.95</b> | 0.97                                 | 0.80 | 1.18  | <b>1.43</b>  | <b>1.17</b> | <b>1.75</b> |
| <i>Model 2: Among men 50+ who Received Routine PSA Testing and Saw a PCP or Specialist in the Past Year<sup>b</sup></i> |             |      |       |                    |             |             |                                      |      |       |              |             |             |
| Year                                                                                                                    | aPR         |      | 95%CI | aPR                |             | 95%CI       | aPR                                  |      | 95%CI | aPR          |             | 95%CI       |
| 2010                                                                                                                    | 1.00        |      |       | 1.00               |             |             | 1.00                                 |      |       | 1.00         |             |             |
| 2015                                                                                                                    | 1.07        | 1.00 | 1.15  | 0.87               | 0.73        | 1.04        | 0.94                                 | 0.76 | 1.17  | <b>1.47</b>  | <b>1.19</b> | <b>1.83</b> |

Abbreviations: Prostate Specific Antigen (PSA), National Health Interview Survey (NHIS), adjusted Prevalence Ratio (aPR), Confidence Interval (CI), Primary Care Physician (PCP)

- Model 1 adjusts for age, race/ethnicity, educational attainment, insurance type, immigration status, and geographic region. Includes only men 3,299 who received PSA testing for Routine Reasons within the past 2 years. Bold font indicates statistical significance ( $p < 0.05$ ).
- Model 2 adjusts for age, race/ethnicity, educational attainment, insurance type, immigration status, and geographic region. Includes 2,453 men who received routine PSA testing in the past year and saw a primary care physician or specialist. Bold font indicates statistical significance ( $p < 0.05$ ).

Supplemental Table 4. Sociodemographic Factors Associated with Full Shared Decision Making among Men 50 years and Older, NHIS 2010 and 2015

|                       | Among Men with Recent PSA Testing |             |             | Among Men with Non-Recent PSA Testing |             |             | Among Men without PSA Testing |             |             |
|-----------------------|-----------------------------------|-------------|-------------|---------------------------------------|-------------|-------------|-------------------------------|-------------|-------------|
|                       | Full SDM vs none                  |             |             | Full SDM vs none                      |             |             | Full SDM vs none              |             |             |
|                       | aPR                               | 95%CI       |             | aPR                                   | 95%CI       |             | aPR                           | 95%CI       |             |
| <b>Age</b>            |                                   |             |             |                                       |             |             |                               |             |             |
| 50-64 years           | 1.00                              |             |             | 1.00                                  |             |             | 1.00                          |             |             |
| 65-74 years           | 1.24                              | 0.88        | 1.76        | 0.75                                  | 0.49        | 1.16        | 1.04                          | 0.53        | 2.01        |
| 75+ years             | 0.99                              | 0.63        | 1.54        | 0.85                                  | 0.54        | 1.33        | 1.47                          | 0.70        | 3.10        |
| <b>Race/Ethnicity</b> |                                   |             |             |                                       |             |             |                               |             |             |
| NH White              | 1.00                              |             |             | 1.00                                  |             |             | 1.00                          |             |             |
| Hispanic              | 1.04                              | 0.65        | 1.67        | 1.43                                  | 0.81        | 2.55        | <b>2.24</b>                   | <b>1.09</b> | <b>4.63</b> |
| Black                 | <b>1.48</b>                       | <b>1.07</b> | <b>2.05</b> | 1.46                                  | 0.99        | 2.16        | 1.29                          | 0.58        | 2.86        |
| Other                 | 1.09                              | 0.61        | 1.95        | 1.31                                  | 0.72        | 2.39        | 1.53                          | 0.52        | 4.51        |
| <b>Education</b>      |                                   |             |             |                                       |             |             |                               |             |             |
| College Graduate      | 1.00                              |             |             | 1.00                                  |             |             | 1.00                          |             |             |
| <HS Diploma           | <b>0.45</b>                       | <b>0.28</b> | <b>0.71</b> | 0.74                                  | 0.45        | 1.23        | <b>0.29</b>                   | <b>0.11</b> | <b>0.76</b> |
| HS or GED             | <b>0.62</b>                       | <b>0.46</b> | <b>0.82</b> | 0.81                                  | 0.58        | 1.14        | <b>0.40</b>                   | <b>0.21</b> | <b>0.75</b> |
| Some college          | <b>0.58</b>                       | <b>0.45</b> | <b>0.76</b> | <b>0.50</b>                           | <b>0.33</b> | <b>0.76</b> | 0.61                          | 0.34        | 1.08        |
| <b>Insurance</b>      |                                   |             |             |                                       |             |             |                               |             |             |
| Private               | 1.00                              |             |             | 1.00                                  |             |             | 1.00                          |             |             |
| Medicaid              | 0.76                              | 0.32        | 1.80        | 0.32                                  | 0.12        | 0.85        | 0.30                          | 0.09        | 1.00        |
| Medicare              | 0.91                              | 0.64        | 1.30        | 1.09                                  | 0.71        | 1.66        | 0.66                          | 0.36        | 1.22        |
| Military              | 1.19                              | 0.76        | 1.86        | 0.99                                  | 0.55        | 1.80        | 0.76                          | 0.24        | 2.45        |
| Uninsured             | 0.21                              | 0.04        | 1.05        | 0.52                                  | 0.25        | 1.05        | 0.39                          | 0.11        | 1.34        |
| Other                 | 1.08                              | 0.65        | 1.79        | 0.95                                  | 0.45        | 1.99        | 0.43                          | 0.12        | 1.54        |

Abbreviations: adjusted Prevalence Ratio (aPR), Confidence Interval (CI), Shared Decision Making (SDM)

- a. Models adjusts for survey year, age, race/ethnicity, educational attainment, insurance type, immigration status, and geographic region.

Supplemental Table 5. Suggesting PSA Testing among Men 50+ who received PSA Testing in the Past Year, NHIS 2015

|                               | Self | Doctor | Someone Else | P-value | Doctor Suggested vs. Self or Someone Else <sup>a</sup> |             |             |
|-------------------------------|------|--------|--------------|---------|--------------------------------------------------------|-------------|-------------|
|                               | %    | %      | %            |         | aPR                                                    | 95% CI      |             |
| <b>TOTAL</b>                  | 11.9 | 85.0   | 3.1          |         |                                                        |             |             |
| <b>Age Category</b>           |      |        |              | <0.001  |                                                        |             |             |
| 50-64yrs                      | 12.7 | 83.0   | 4.3          |         | 1.00                                                   |             |             |
| 65-74 yrs                     | 11.4 | 86.4   | 2.2          |         | 0.98                                                   | 0.89        | 1.09        |
| 75+ yrs                       | 9.9  | 89.3   | 0.8          |         | 1.01                                                   | 0.90        | 1.13        |
| <b>Race/Ethnicity</b>         |      |        |              | <0.001  |                                                        |             |             |
| Non-Hispanic White            | 12.3 | 84.6   | 3.2          |         | 1.00                                                   |             |             |
| Hispanic                      | 11.6 | 83.3   | 5.1          |         | 1.01                                                   | 0.92        | 1.10        |
| Non-Hispanic Black            | 6.8  | 91.0   | 2.2          |         | <b>1.08</b>                                            | <b>1.03</b> | <b>1.13</b> |
| Other                         | 17.5 | 82.2   | 0.3          |         | 0.94                                                   | 0.81        | 1.09        |
| <b>Educational Attainment</b> |      |        |              |         |                                                        |             |             |
| <HS Diploma                   | 7.2  | 90.1   | 2.7          |         | 1.05                                                   | 0.98        | 1.13        |
| HS or GED                     | 11.4 | 84.9   | 3.7          |         | 0.97                                                   | 0.91        | 1.04        |
| Some College                  | 12.8 | 82.8   | 4.4          |         | 0.95                                                   | 0.90        | 1.01        |
| College Graduate              | 12.5 | 85.4   | 2.1          |         | 1.00                                                   |             |             |
| <b>Insurance Category</b>     |      |        |              | 0.013   |                                                        |             |             |
| Private                       | 13.4 | 82.4   | 4.2          |         | 1.00                                                   |             |             |
| Medicaid/State Plan           | 16.0 | 82.1   | 1.9          |         | 0.98                                                   | 0.82        | 1.17        |
| Medicare                      | 11.1 | 87.0   | 2.0          |         | 1.07                                                   | 0.98        | 1.16        |
| Military                      | 11.9 | 83.9   | 4.2          |         | 1.08                                                   | 0.97        | 1.20        |
| Uninsured                     | 12.1 | 79.4   | 8.5          |         | 0.97                                                   | 0.82        | 1.15        |
| Other                         | 5.2  | 93.7   | 1.1          |         | <b>1.14</b>                                            | <b>1.05</b> | <b>1.23</b> |

Abbreviations: adjusted Prevalence Ratio (aPR), Confidence Interval (CI)

- a. Models adjust for age, race/ethnicity, educational attainment, insurance type, immigration status, and geographic region. Bold font indicates statistical significance (p<0.05).

# Supplemental Figure 1. Derivation of the PSA Screening Study Population, National Health Interview Survey 2010 and 2015

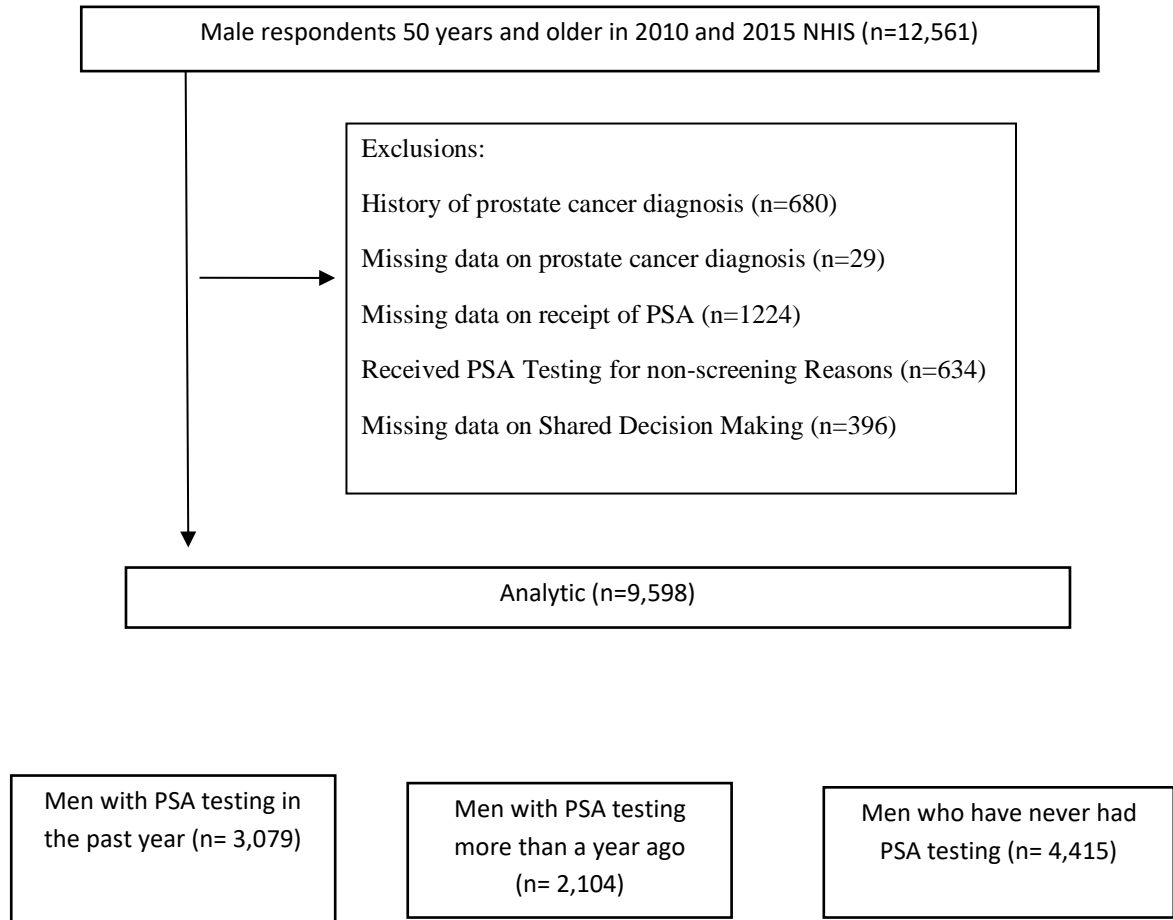

Supplement: Fedewa_Supp_Apps.pdf [file Fedewa_Supp_Apps.pdf]
